# Supplementary material for: Metabolite Profiling of Diverse Rice Germplasm and Identification of Conserved Metabolic Markers of Rice Roots in Response to Long-Term Mild Salinity Stress
Source: Int J Mol Sci. 2015 Sep 11;16(9):21959–74. doi: 10.3390/ijms160921959 (PMC4613291; doi:10.3390/ijms160921959)
Supplement: Supplementary file 1 [file ijms-16-21959-s001.xlsx]

## Sheet: Figure S1
Figure S1. Normalized intensities of metabolites in the control or salt-treated rice roots. (A) Normalized intensities of metabolites in the control or salt-treated rice roots. Average intensities of 38 genotypes (total), 19 high growth genotypes (HG) or 19 low growth genotypes (LG) were shown, respectively; (B) Normalized intensities of metabolites in the control or salt-treated rice roots of 8 …

## Sheet: Table S1
Table S1. List of 38 rice genotypes.
Number	RDA-Genbank ID	Name	Source location	Subspecies type
1	K003098	Bebzera	Uzbekistan	NI
2	IT204549	Suhynghado	China	NI
3	IT001083	Dharial*	SUR	Aus/boro
4	IT901500	Binato	Philipine	Indica
5	NA	Pokkali*	IRRI	Indica
6	IT168483	Suncheon-5 (Angmi)	Korea	Weedy rice
7	IT169003	Danyang-9 (Angmi)*	Korea	Weedy rice
8	IT001158	Dular	India	Aus/boro
9	IT003068	Mushkan	Pakistan	NI
10	IT117766	Yangshatsan	China	NI
11	K046496	Basmati 370*	IRRI	Indica
12	IT168374	Hwayang-12 (Angmi)*	Korea	Weedy rice
13	K003090	Avangard	Uzbekistan	NI
14	K046491	Azucena*	IRRI	Indica
15	K019941	Hawm supan*	Thailand	Indica
16	K046523	C039	IRRI	NI
17	K046495	U*	IRRI	NI
18	IT114332	Sungpan Tao	China	NI
19	IT004529	Victoria F.A.	Argentina	NI
20	K046504	ARC10177	IRRI	Indica
21	NA	Chindadachigi	Korea	Korea traditional rice
22	NA	Dongjin	Korea	Japonica
23	IT152647	Yupul**	LBR	NI
24	NA	IR55423 (APO)**	IRRI	Indica
25	IT211377	Okayama nishiki	Japan	Japonica
26	IR74371	IR74371	IRRI	Javanica
27	NA	Chucheong	Korea	Japonica
28	IT114620	Tsong gan shun	China	NI
29	IT213678	Sharae	Korea	Weedy rice
30	IT211220	Shizohwang**	China	NI
31	NA	Ilpoom	Korea	Japonica
32	IT008806	Chungpungdo**	Korea	Japonica
33	IT008431	Jodo**	Korea	Japonica
34	NA	N22	IRRI	Indica
35	NA	IR29**	IRRI	Indica
36	IT168703	Koryung**	Korea	Korea tradirional rice
37	IT212310	U**	Nigeria	NI
38	NA	Muando	Korea	Japonica
Number 1-19, HG (high growth), 20-28;LG (low growth) type rice genotypes
* indicates HGST (High growth and salt tolerant) type rice accessions based on the biomass accmulation under mild salt stress condition.
** indicates LGSS (Low growth and salt sensitive) type rice accessions based on the biomass accmulation under mild salt stress condition.
NA: not applied, NI: no information available, U: unknown, SUR: Surinami, SUN: Russia, LBR: Liberia

## Sheet: Table S2
Table S2. Quantification of identified metabolites. The relative peak intensities of eight distinctive salt-responsive metabolites were quantified and compared among 38 rice genotypes. HG, high growth rice genotypes; LG, low growth rice genotypes; Salt, 43 mM NaCl.
	RDA-Genbank ID	Name	Normalized Intensity
			Sucrose	Allantoin	Glutamate	Alanine	Threonine	Glucose	Choline	Glutamine
1	K003098	Bebzera	0.0129976	0.00089482	0.002907	0.0064726	0.0027268	0.0049216	0.027859	0.02781	HG-Control
2	IT204549	Suhynghado	0.0140628	0.00263641	0.0045615	0.0099139	0.0033415	0.0039786	0.035984	0.043175
3	IT001083	Dharial	0.0130898	0.00151746	0.0033823	0.0071488	0.0029964	0.0038838	0.0378	0.028234
4	IT901500	Binato	0.0118067	0.0031692	0.0030761	0.0055842	0.0026117	0.002964	0.036239	0.028392
5	Pokkali	Pokkali	0.0175481	0.0015066	0.0024247	0.0063464	0.0024808	0.0043446	0.02649	0.028985
6	IT168483	Angmi	0.0032938	0.0014169	0.0053203	0.0069685	0.0034006	0.0065017	0.038479	0.0357475
7	IT169003	Angmi	0.0079038	0.0016113	0.0041802	0.006519	0.002929	0.0050582	0.036793	0.0367451
8	IT001158	Dular	0.00515	0.0010786	0.004042	0.0070419	0.0030526	0.0077971	0.037894	0.0274415
9	IT003068	Mushkan	0.0170027	0.00106326	0.0028085	0.005714	0.0024621	0.0029756	0.028321	0.035153
10	IT117766	Yangshatsan	0.0048962	0.0033758	0.0061184	0.0108719	0.0046174	0.0031197	0.044827	0.037517
11	K046496	Basmati 370	0.0071669	0.0033039	0.0079634	0.0144543	0.010324	0.00199297	0.045145	0.043148
12	IT168374	Angmi	0.00930522	0.00250234	0.0041572	0.0115085	0.0029903	0.0036285	0.048069	0.045728
13	K003090	Avangard	0.0067755	0.00133925	0.0052812	0.0084316	0.0037281	0.0041036	0.047292	0.04012
14	K046491	Azucena	0.0062411	0.00225	0.006692	0.0083157	0.0042296	0.0023146	0.039878	0.054837
15	K019941	Hawm supan	0.0083241	0.0037893	0.0063203	0.0138903	0.0031815	0.0025694	0.054581	0.043446
16	K046523	C039	0.0105867	0.0029908	0.0040984	0.0151252	0.0024656	0.0038546	0.049345	0.046379
17	K046495	N22 1	0.0124724	0.0019257	0.0046001	0.0144401	0.0022613	0.0030776	0.041732	0.044434
18	IT114332	Sungpan Tao	0.0110146	0.00091691	0.0035509	0.0052864	0.00308	0.004252	0.0435722	0.028767
19	IT004529	Victoria F.A.	0.0107812	0.0039527	0.0042426	0.0073937	0.0028423	0.0034768	0.032648	0.026491
20	K046504	ARC10177	0.0122397	0.0020632	0.0031685	0.0091757	0.0020237	0.0026538	0.024881	0.031828	LG-Control
21	Chindadachigi	Chindadachigi	0.0101148	0.0040631	0.0030364	0.0062374	0.0027542	0.0031019	0.035374	0.028252
22	Dongjin	Dongjin	0.0135187	0.0031343	0.0065971	0.0073299	0.0037057	0.0040615	0.03118	0.0336639
23	IT152647	Yupul	0.0103026	0.0038221	0.0063802	0.0046606	0.002897	0.0044141	0.033798	0.027035
24	IR55423 (APO)	IR55423 (APO)	0.0104926	0.0093211	0.0040162	0.0061726	0.0027092	0.0039021	0.041515	0.027178
25	IT211377	Okayama nishiki	0.012259	0.0031527	0.0082012	0.0060667	0.0056108	0.0038301	0.037694	0.024792
26	IR74371	IR74371	0.011913	0.0058482	0.0039017	0.0063324	0.002494	0.0035621	0.040506	0.032753
27	Chucheong	Chucheong	0.0142974	0.0060582	0.0044087	0.0056405	0.0027384	0.002278	0.032619	0.033243
28	IT114620	Tsong gan shun	0.015508	0.00621	0.0030848	0.0048046	0.0025522	0.0020593	0.036263	0.03049
29	IT213678	Sharae	0.0109246	0.0041084	0.0046722	0.0070585	0.0025141	0.0016461	0.035591	0.025864
30	IT211220	Shizohwang	0.0136693	0.00307305	0.003893	0.0073401	0.0026743	0.0049668	0.0390935	0.037
31	Ilpoom	Ilpoom	0.010766	0.0040277	0.0029281	0.00565	0.0025165	0.0026844	0.03448	0.035776
32	IT008806	Chungpungdo	0.0096866	0.0044503	0.0047396	0.0060689	0.0023936	0.002341	0.038414	0.047148
33	IT008431	Jodo	0.0139049	0.0059122	0.0040647	0.005813	0.0026748	0.0035192	0.043107	0.03231
34	N22	N22	0.0133404	0.0041352	0.0036792	0.0082981	0.0023821	0.00378292	0.045405	0.04462
35	IR29	IR29	0.0099344	0.0075765	0.0060421	0.0068991	0.0035336	0.003651	0.047547	0.040997
36	IT168703	Koryung	0.0152896	0.0030914	0.0037512	0.0079397	0.0021425	0.0037811	0.033533	0.056717
37	IT212310	U	0.0114435	0.005309	0.0064326	0.0073657	0.0042264	0.003565	0.048102	0.038234
38	Muando	Muando	0.014899	0.00198364	0.0031988	0.0166972	0.0024106	0.0038419	0.0335152	0.03381
39	K003098	Bebzera	0.0133065	0.0107587	0.0058524	0.0047718	0.0045798	0.0051901	0.043922	0.01301	HG-Salt
40	IT204549	Suhynghado	0.0218681	0.007352	0.0042992	0.0059367	0.003228	0.0038206	0.037441	0.0135
41	IT001083	Dharial	0.0182224	0.0045771	0.0046018	0.0063898	0.0033199	0.0034466	0.043785	0.0127544
42	IT901500	Binato	0.0224552	0.0098055	0.0054892	0.00619	0.0047023	0.0034483	0.038824	0.0119113
43	Pokkali	Pokkali	0.0203866	0.0033166	0.0037077	0.0077371	0.0036191	0.0028661	0.030579	0.0109872
44	IT168483	Angmi	0.0179217	0.0057033	0.0052592	0.0054377	0.0029968	0.0036423	0.032128	0.011061
45	IT169003	Angmi	0.0154291	0.0082076	0.0036369	0.0044049	0.0036543	0.002783	0.045648	0.011832
46	IT001158	Dular	0.0085863	0.0046096	0.0050381	0.006128	0.0039979	0.0069609	0.041705	0.0110821
47	IT003068	Mushkan	0.0238911	0.0026033	0.0031975	0.0051178	0.0026558	0.0029682	0.033601	0.0139822
48	IT117766	Yangshatsan	0.01522	0.0155838	0.0136206	0.0073817	0.0052934	0.0026524	0.0557	0.015743
49	K046496	Basmati 370	0.0155582	0.0093804	0.0137831	0.0134118	0.0058094	0.0038714	0.038581	0.0152937
50	IT168374	Angmi	0.0222978	0.0101667	0.0137923	0.0108953	0.0044631	0.0035789	0.037908	0.013975
51	K003090	Avangard	0.0152297	0.0125541	0.0126172	0.0090572	0.0048681	0.0042253	0.043239	0.0132306
52	K046491	Azucena	0.0259709	0.00885788	0.0136693	0.0085662	0.003667	0.0026345	0.036379	0.019249
53	K019941	Hawm supan	0.0182462	0.0107736	0.013489	0.0089405	0.0046461	0.0038298	0.0508636	0.0128245
54	K046523	C039	0.0119103	0.0123895	0.0125321	0.0101201	0.0051506	0.0027614	0.051486	0.015829
55	K046495	N22 1	0.0116843	0.013202	0.010495	0.0083476	0.0033072	0.010906	0.048824	0.0156705
56	IT114332	Sungpan Tao	0.0112421	0.0054607	0.0108226	0.0067152	0.0049515	0.0039732	0.045862	0.014747
57	IT004529	Victoria F.A.	0.0177073	0.0097677	0.006235	0.005306	0.0032462	0.0020613	0.050152	0.018596
58	K046504	ARC10177	0.0247916	0.00696898	0.0078037	0.0052382	0.0030854	0.0020271	0.035829	0.020313	LG-Salt
59	Chindadachigi	Chindadachigi	0.018999	0.0125553	0.0075811	0.0050301	0.0039792	0.0018111	0.041104	0.018126
60	Dongjin	Dongjin	0.0109002	0.00940232	0.0075337	0.006121	0.0064549	0.0047577	0.038006	0.0135419
61	IT152647	Yupul	0.0234821	0.0079769	0.0058016	0.0058422	0.004597	0.0035297	0.04103	0.01686
62	IR55423 (APO)	IR55423 (APO)	0.0160253	0.0133103	0.0048105	0.0053688	0.0033321	0.003932	0.047805	0.0152243
63	IT211377	Okayama nishiki	0.0255107	0.00368986	0.0124503	0.0056977	0.0044166	0.0035421	0.0338011	0.0125038
64	IR74371	IR74371	0.0172925	0.0155287	0.0052728	0.0052284	0.0045801	0.00423	0.046754	0.0153749
65	Chucheong	Chucheong	0.0253169	0.0114879	0.0057984	0.0055451	0.0035275	0.002731	0.04155	0.01741
66	IT114620	Tsong gan shun	0.025742	0.0090307	0.0058816	0.00375401	0.0031516	0.002017	0.040183	0.015025
67	IT213678	Sharae	0.018373	0.0094314	0.0073966	0.0050939	0.0032921	0.0019422	0.047752	0.020897
68	IT211220	Shizohwang	0.0231367	0.0097755	0.007741	0.0061022	0.0030087	0.0023907	0.036965	0.02719
69	Ilpoom	Ilpoom	0.0214451	0.0080044	0.0074262	0.0060211	0.0034289	0.0024648	0.041084	0.021741
70	IT008806	Chungpungdo	0.024325	0.00886081	0.0082132	0.0050586	0.0032396	0.0023844	0.037221	0.023599
71	IT008431	Jodo	0.0262285	0.00761277	0.0071775	0.0052994	0.0025914	0.0018647	0.035007	0.021678
72	N22	N22	0.0068404	0.0099556	0.0109089	0.0070093	0.0051125	0.0043392	0.052528	0.024617
73	IR29	IR29	0.0088627	0.0095457	0.00689173	0.0130786	0.0085832	0.003764	0.0477019	0.0114862
74	IT168703	Koryung	0.0210909	0.00762386	0.0108087	0.0058669	0.0031373	0.0031436	0.03589	0.024876
75	IT212310	U	0.0129729	0.00093594	0.002776	0.006169	0.0024111	0.0050703	0.027923	0.027771
76	Muando	Muando	0.0264224	0.00590376	0.0106556	0.0096532	0.0032118	0.0026269	0.034576	0.019851
